# Supplementary material for: Effects of News Media Messages About Mass Shootings on Attitudes Toward Persons With Serious Mental Illness and Public Support for Gun Control Policies
Source: Atypon-hosted journal article supplement (doi:10.1176/appi.ajp.2013.13010014), 2013-03-20
Supplement: 494_ds001.pdf [file 494_ds001.pdf]

**Contents**

**A. Results of Ordinal Logistic Regression**

**B. Question Block Order Sensitivity Analysis**

**C. Characteristics of Survey Respondents, Weighted and Unweighted**

**A. Results of Ordinal Logistic Regression**

TABLE S1. News story effects on attitudes about persons with serious mental illness (N=1,797)

| News Story                                                                | N   | Attitudes About Persons with Serious Mental Illness<br>Coefficient <sup>1</sup> (SE) |                                                           |                                                 |
|---------------------------------------------------------------------------|-----|--------------------------------------------------------------------------------------|-----------------------------------------------------------|-------------------------------------------------|
|                                                                           |     | Social Distance:<br>Work closely with<br>(ref=no exposure)                           | Social Distance:<br>Have as neighbor<br>(ref=no exposure) | Perceived<br>Dangerousness<br>(ref=no exposure) |
| Story 1: Mass Shooting Event                                              | 923 | 0.59 (0.15)***                                                                       | 0.58 (0.15)***                                            | 0.50 (0.15)**                                   |
| Story 2: Mass Shooting Event + Serious<br>Mental Illness Gun Restrictions | 894 | 0.029 (0.15)                                                                         | 0.53 (0.15)***                                            | 0.06 (0.15)                                     |
| Story 3: Mass Shooting Event + Large<br>Capacity Magazine Ban             | 892 | 0.45 (0.15)**                                                                        | 0.51 (0.15)**                                             | 0.24 (0.14)                                     |

\*\*\*p<0.001, \*\*p<0.01, \*p<0.05

<sup>1</sup> Ordered logit regression coefficient

TABLE S2. News story effects on support for gun policies (N=1,797)

| News Story                                                                | N   | Policy Support<br>Coefficient <sup>1</sup> (SE)                 |                                                     |
|---------------------------------------------------------------------------|-----|-----------------------------------------------------------------|-----------------------------------------------------|
|                                                                           |     | Serious mental illness<br>gun restrictions<br>(ref=no exposure) | Large capacity magazine<br>ban<br>(ref=no exposure) |
| Story 1: Mass Shooting Event                                              | 923 | 0.43 (0.16)**                                                   | 0.18 (0.15)                                         |
| Story 2: Mass Shooting Event + Serious Mental Illness<br>Gun Restrictions | 894 | 0.55 (0.15)                                                     | 0.40 (0.15)**                                       |
| Story 3: Mass Shooting Event + Large Capacity Magazine<br>Ban             | 892 | 0.40 (0.16)*                                                    | 0.71 (0.15)***                                      |

\*\*\*p<0.001, \*\*p<0.01, \*p<0.05

<sup>1</sup> Ordered logit regression coefficient

## B. Question Block Order Sensitivity Analysis

TABLE S3. News story message effects on attitudes about persons with serious mental illness among participants who answered questions on attitudes about persons with serious mental illness prior to gun policy questions (N=884)

| News Story                                                                | N   | Attitudes About Persons with Serious Mental Illness<br>(OR, 95% CI) |                                                           |                                              |
|---------------------------------------------------------------------------|-----|---------------------------------------------------------------------|-----------------------------------------------------------|----------------------------------------------|
|                                                                           |     | Social Distance:<br>Work closely with<br>(ref=no exposure)          | Social Distance:<br>Have as neighbor<br>(ref=no exposure) | Perceived Dangerousness<br>(ref=no exposure) |
| Story 1: Mass Shooting Event                                              | 448 | 2.25<br>(1.40-3.63)**                                               | 2.03<br>(1.21-3.42)**                                     | 2.16<br>(1.34-3.46)**                        |
| Story 2: Mass Shooting Event + Serious<br>Mental Illness Gun Restrictions | 416 | 1.95<br>(1.21-3.13)**                                               | 2.77<br>(1.65-4.64)***                                    | 1.32<br>(0.82-2.12)                          |
| Story 3: Mass Shooting Event + Large<br>Capacity Magazine Ban             | 433 | 1.74<br>(1.09-2.78)**                                               | 2.38<br>(1.43-3.95)**                                     | 1.33<br>(0.83-2.12)                          |

\*\*\*p<0.001, \*\*p<0.01, \*p<0.05

TABLE S4. News story message effects on attitudes about persons with serious mental illness among participants who answered gun policy questions prior to questions on attitudes about persons with serious mental illness (N=913)

| News Story                                                                | N   | Attitudes About Persons with Serious Mental Illness<br>(OR, 95% CI) |                                                           |                                              |
|---------------------------------------------------------------------------|-----|---------------------------------------------------------------------|-----------------------------------------------------------|----------------------------------------------|
|                                                                           |     | Social Distance:<br>Work closely with<br>(ref=no exposure)          | Social Distance:<br>Have as neighbor<br>(ref=no exposure) | Perceived Dangerousness<br>(ref=no exposure) |
| Story 1: Mass Shooting Event                                              | 470 | 1.34<br>(0.83-2.18)                                                 | 1.29<br>(0.78-2.11)                                       | 1.55<br>(0.97-2.49)                          |
| Story 2: Mass Shooting Event + Serious<br>Mental Illness Gun Restrictions | 438 | 1.04<br>(0.63-1.72)                                                 | 1.20<br>(0.72-1.98)                                       | 1.28<br>(0.79-2.08)                          |
| Story 3: Mass Shooting Event + Large<br>Capacity Magazine Ban             | 455 | 1.62<br>(0.99-2.63)                                                 | 1.33<br>(0.81-2.19)                                       | 1.38<br>(0.86-2.22)                          |

\*\*\*p<0.001, \*\*p<0.01, \*p<0.05

TABLE S5. News story effects on support for gun policies among participants who answered questions on attitudes about persons with serious mental illness prior to gun policy questions (N=884)

| News Story                                                             | N   | Policy Support (OR, 95% CI)                               |                                               |
|------------------------------------------------------------------------|-----|-----------------------------------------------------------|-----------------------------------------------|
|                                                                        |     | Serious mental illness gun restrictions (ref=no exposure) | Large capacity magazine ban (ref=no exposure) |
| Story 1: Mass Shooting Event                                           | 448 | 0.86<br>(0.50-1.46)                                       | 0.77<br>(0.48-1.24)                           |
| Story 2: Mass Shooting Event + Serious Mental Illness Gun Restrictions | 416 | 1.05<br>(0.60-1.83)                                       | 1.26<br>(0.78-2.03)                           |
| Story 3: Mass Shooting Event + Large Capacity Magazine Ban             | 433 | 1.05<br>(0.61-1.81)                                       | 2.21<br>(1.35-3.62)**                         |

\*\*\*p<0.001, \*\*P<0.01, \*P<0.05

TABLE S6. News story effects on support for gun policies among participants who answered gun policy questions prior to questions on attitudes about persons with serious mental illness (N=913)

| News Story                                                             | N   | Policy Support (OR, 95% CI)                               |                                               |
|------------------------------------------------------------------------|-----|-----------------------------------------------------------|-----------------------------------------------|
|                                                                        |     | Serious mental illness gun restrictions (ref=no exposure) | Large capacity magazine ban (ref=no exposure) |
| Story 1: Mass Shooting Event                                           | 470 | 2.81<br>(1.63-4.86)***                                    | 2.47<br>(1.53-3.96)***                        |
| Story 2: Mass Shooting Event + Serious Mental Illness Gun Restrictions | 438 | 1.55<br>(0.88-2.71)                                       | 2.47<br>(1.50-4.07)***                        |
| Story 3: Mass Shooting Event + Large Capacity Magazine Ban             | 455 | 2.06<br>(1.18-3.57)*                                      | 2.59<br>(1.61-4.17)***                        |

\*\*\*p<0.001, \*\*P<0.01, \*P<0.05

## C. Characteristics of Survey Respondents, Weighted and Unweighted

TABLE S7. Unweighted and weighted characteristics of GfK Knowledge Networks survey respondents compared with national rates

|                                               | Full Sample<br>Unweighted<br>(N=1,797) | Full Sample<br>Weighted<br>(N=1,797) | National Rates |
|-----------------------------------------------|----------------------------------------|--------------------------------------|----------------|
| <b>Individual characteristics<sup>1</sup></b> |                                        |                                      |                |
| Female (%)                                    | 50.5                                   | 51.4                                 | 52.4           |
| Age (%)                                       |                                        |                                      |                |
| Age 18 – 24                                   | 8.3                                    | 11.0                                 | 11.3           |
| Age 25 – 34                                   | 11.7                                   | 16.8                                 | 16.7           |
| Age 35 – 44                                   | 14.6                                   | 16.5                                 | 16.7           |
| Age 45 – 54                                   | 19.2                                   | 16.7                                 | 19.0           |
| Age 55 – 64                                   | 22.8                                   | 21.2                                 | 17.3           |
| Age 65 +                                      | 23.4                                   | 17.8                                 | 18.9           |
| Race (%)                                      |                                        |                                      |                |
| White only                                    | 76.8                                   | 68.4                                 | 82.4           |
| Black only                                    | 9.0                                    | 11.5                                 | 9.9            |
| Other                                         | 14.2                                   | 20.1                                 | 7.7            |
| Hispanic Ethnicity                            |                                        |                                      |                |
| Hispanic                                      | 7.9                                    | 13.5                                 | 11.3           |
| Non-Hispanic                                  | 92.1                                   | 86.5                                 | 88.7           |
| Education (%)                                 |                                        |                                      |                |
| < high school degree                          | 7.9                                    | 12.4                                 | 13.0           |
| High school degree                            | 29.3                                   | 30.3                                 | 30.3           |
| Some college                                  | 29.2                                   | 28.9                                 | 28.7           |
| Bachelor's degree or higher                   | 33.6                                   | 28.4                                 | 28.0           |
| Household income (%)                          |                                        |                                      |                |
| Under \$10,000                                | 4.8                                    | 6.7                                  | 6.8            |
| \$10,000-24,999                               | 12.0                                   | 12.6                                 | 16.8           |
| \$25,000-49,999                               | 22.8                                   | 22.6                                 | 26.2           |
| \$50,000-74,999                               | 19.3                                   | 19.6                                 | 19.2           |
| \$75,000                                      | 41.1                                   | 38.5                                 | 30.9           |
| Employment status (%)                         |                                        |                                      |                |
| Employed                                      | 55.3                                   | 56.7                                 | NA             |
| Unemployed                                    | 8.9                                    | 10.5                                 | NA             |
| Retired                                       | 22.4                                   | 17.9                                 | NA             |
| Other (e.g. disabled, homemaker, other)       | 13.4                                   | 14.9                                 | NA             |
| Region (%)                                    |                                        |                                      |                |
| Northeast                                     | 18.7                                   | 18.1                                 | 18.4           |
| Midwest                                       | 24.0                                   | 22.3                                 | 21.7           |
| South                                         | 35.7                                   | 37.5                                 | 36.7           |
| West                                          | 21.6                                   | 22.1                                 | 23.2           |

(TABLE S7, Continued)

| Political Party Affiliation (%) <sup>2</sup> |      |      |                   |
|----------------------------------------------|------|------|-------------------|
| Republican                                   | 44.9 | 41.6 | 51.0              |
| Undecided/Independent/Other                  | 3.4  | 3.9  | 11.0 <sup>3</sup> |
| Democrat                                     | 51.7 | 54.5 | 37.0              |

<sup>1</sup> Comparison data extracted from the December 2010 Current Population Survey, as cited by <http://www.knowledgenetworks.com/knpanel/docs/GfK-KnowledgePanel%28R%29-Demographic-Profile>. Question wording differences for employment variable in GfK KN and CPS, therefore no comparison data provided.

<sup>2</sup> Comparison data extracted from the 2008 American National Election Study (NES).

[http://www.electionstudies.org/nesguide/toptable/tab2a\\_2.htm](http://www.electionstudies.org/nesguide/toptable/tab2a_2.htm)

<sup>3</sup>Independent
